# Supplementary material for: Role of CD68 in tumor immunity and prognosis prediction in pan-cancer
Source: PubMed Central journal article supplement (PMC9098459; doi:10.1038/s41598-022-11503-2), 2022-05-12

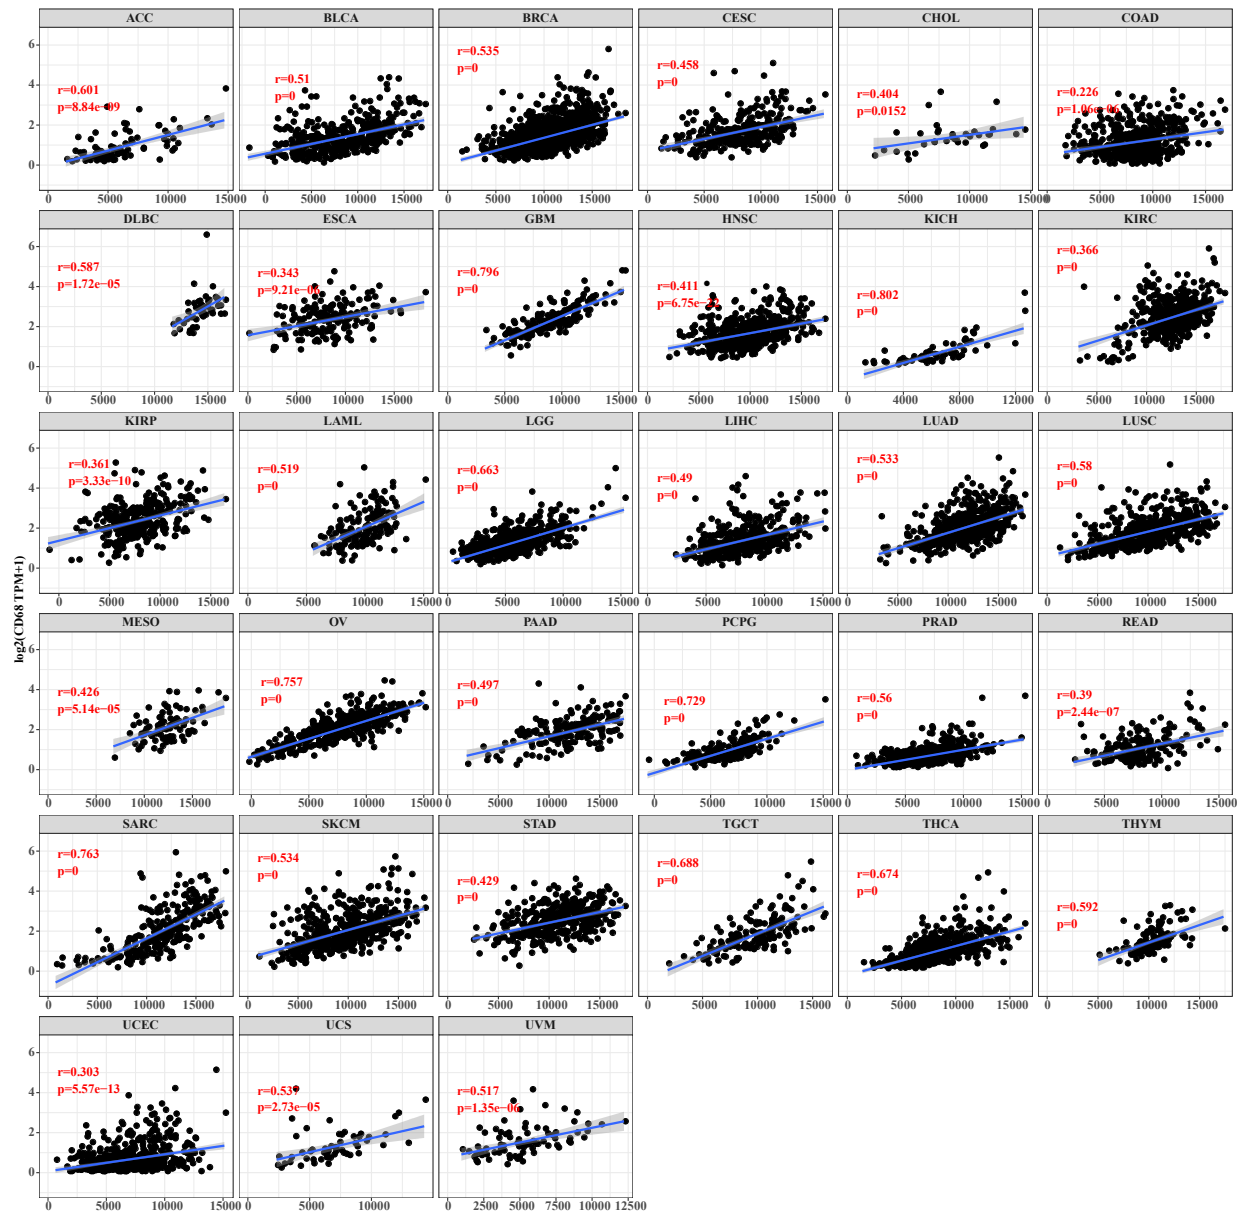

Supplement: 41598_2022_11503_MOESM6_ESM.pdf [file 41598_2022_11503_MOESM6_ESM.pdf]
