# Supplementary material for: Role of CD68 in tumor immunity and prognosis prediction in pan-cancer
Source: Sci Rep. 2022 May 12;12:7844. doi: 10.1038/s41598-022-11503-2 (PMC9098459; doi:10.1038/s41598-022-11503-2)
Supplement: Supplementary file 9 — Supplementary Table 1. [file 41598_2022_11503_MOESM9_ESM.xlsx]

## Sheet: Sheet1
Cancer	P	R
GBM	0.878	0.013
OV	0.306	0.075
LUAD	0.037	0.162
LUSC	0.039	-0.039
BRCA	0.136	0.055
KIRC	0.706	0.019
KIRP	0.000728	0.26
UCEC	0.0656	0.118
COAD	0.917	0.011
READ	0.219	-0.17
STAD	0.237	-0.077
HNSC	0.411	-0.05
LIHC	0.907	-0.008
SKCM	0.105	0.165
CESC	0.000423	0.253
THCA	0.218	-0.07
BLCA	0.861	0.015
PRAD	0.029	0.135
LGG	0.11	0.114
