# Supplementary material for: Role of CD68 in tumor immunity and prognosis prediction in pan-cancer
Source: Sci Rep. 2022 May 12;12:7844. doi: 10.1038/s41598-022-11503-2 (PMC9098459; doi:10.1038/s41598-022-11503-2)
Supplement: Supplementary file 10 — Supplementary Table 2. [file 41598_2022_11503_MOESM10_ESM.xlsx]

## Sheet: Sheet1
Term	ES	NES	NP	FDR	FWER
KEGG_CHEMOKINE_SIGNALING_PATHWAY	-0.6887	-2.6085	0	0	0
KEGG_CYTOKINE_CYTOKINE_RECEPTOR_INTERACTION	-0.6708	-2.5258	0	0	0
KEGG_CELL_ADHESION_MOLECULES_CAMS	-0.7179	-2.466	0	0	0
KEGG_NATURAL_KILLER_CELL_MEDIATED_CYTOTOXICITY	-0.666	-2.4262	0	0	0
KEGG_VIRAL_MYOCARDITIS	-0.767	-2.4116	0	0	0
HALLMARK_COMPLEMENT	-0.7174	-2.7779	0	0	0
HALLMARK_ALLOGRAFT_REJECTION	-0.8047	-2.6294	0	0	0
HALLMARK_INFLAMMATORY_RESPONSE	-0.7319	-2.6263	0	0	0
HALLMARK_IL6_JAK_STAT3_SIGNALING	-0.7729	-2.531	0	0	0
HALLMARK_IL2_STAT5_SIGNALING	-0.5993	-2.4494	0	0	0
