# Supplementary material for: Role of CD68 in tumor immunity and prognosis prediction in pan-cancer
Source: Sci Rep. 2022 May 12;12:7844. doi: 10.1038/s41598-022-11503-2 (PMC9098459; doi:10.1038/s41598-022-11503-2)
Supplement: Supplementary file 11 — Supplementary Table 3. [file 41598_2022_11503_MOESM11_ESM.xlsx]

## Sheet: SheetName
symbol	drug	cor	fdr
CD68	cerulenin	0.320354	2.81944e-18
CD68	ciclopirox	0.299997	9.6798e-17
CD68	PRIMA-1	0.299453	1.76651e-15
CD68	PX-12	0.288455	4.24848e-15
CD68	PAC-1	0.292397	1.04618e-14
CD68	BRD-K34222889	0.280703	1.70315e-14
CD68	piperlongumine	0.269378	1.5914e-13
CD68	necrosulfonamide	0.321527	5.18858e-13
CD68	Compound 7d-cis	0.289073	1.01727e-12
CD68	pifithrin-mu	0.257845	7.97868e-12
CD68	PL-DI	0.244207	5.36803e-11
CD68	serdemetan	0.252338	6.00957e-11
CD68	methylstat	0.284996	2.37269e-10
CD68	sirolimus	0.233799	6.49118e-10
CD68	Compound 23 citrate	0.233146	8.24908e-10
CD68	ceranib-2	0.224712	8.63359e-10
CD68	vincristine	0.220443	9.1443e-10
CD68	BRD-A86708339	0.339779	1.0008e-09
CD68	CR-1-31B	0.222976	1.09557e-09
CD68	BIX-01294	0.228409	1.19034e-09
