# Supplementary material for: Role of CD68 in tumor immunity and prognosis prediction in pan-cancer
Source: Sci Rep. 2022 May 12;12:7844. doi: 10.1038/s41598-022-11503-2 (PMC9098459; doi:10.1038/s41598-022-11503-2)
Supplement: Supplementary file 12 — Supplementary Table 4. [file 41598_2022_11503_MOESM12_ESM.xlsx]

## Sheet: SheetName
symbol	drug	cor	fdr
CD68	Trametinib	-0.400163	3.01966e-34
CD68	RDEA119	-0.383976	8.43169e-33
CD68	selumetinib	-0.360264	1.23741e-28
CD68	PD-0325901	-0.364452	2.48424e-25
CD68	17-AAG	-0.336912	1.31816e-22
CD68	CI-1040	-0.312561	8.55822e-18
CD68	(5Z)-7-Oxozeaenol	-0.293471	1.80727e-17
CD68	Bleomycin (50 uM)	-0.246657	6.82569e-13
CD68	WZ3105	0.241714	1.06706e-12
CD68	Docetaxel	-0.254757	1.07811e-12
CD68	GSK690693	0.237175	5.51377e-12
CD68	YM201636	0.236634	6.59789e-12
CD68	PIK-93	0.228785	1.47515e-11
CD68	KIN001-102	0.229646	1.50765e-11
CD68	GSK1070916	0.232019	1.95285e-11
CD68	Vorinostat	0.233409	3.98729e-11
CD68	PHA-793887	0.217909	1.32645e-10
CD68	Navitoclax	0.227386	1.44892e-10
CD68	TPCA-1	0.216256	2.02784e-10
CD68	FK866	0.216342	3.98477e-10
